# Supplementary material
Source: publisher site journal article supplement (https://www.dovepress.com/article/572550)
Supplement: Supplementary file 1 [file 572550_Appendix.docx]

**Appendix**

**Table S1.** Hyperparameter settings of the evaluated machine learning models.

| Method | Hyperparameters |
| --- | --- |
| LR | intercept_scaling = 1, max_iter = 100, penalty = l2, solver = lbfgs,  tol = 0.0001, verbose = 0 |
| Decision Tree | criterion = entropy, max_depth = 4, max_features = sqrt,  max_leaf_nodes = None, min_samples_leaf = 10,  min_samples_split = 2, splitter = best |
| SGD | alpha = 0.0001, epsilon = 0.1, fit_intercept = True, l1_ratio = 0.5,  learning_rate = optimal, loss = log_loss, max_iter = 10000,  n_iter_no_change = 5, penalty = elasticnet, power_t = 0.5,  shuffle = True, tol = 0.001, validation_fraction = 0.1, verbose = 0 |
| SVM | C=1.0, cache_size = 200, decision_function_shape = ovr,  degree = 3, gamma = scale, kernel = rbf, max_iter = -1,  probability = True, shrinking = True, tol = 0.001 |
| MLP | activation = relu, alpha = 0.0001, batch_size = 256, beta_1 = 0.9,  beta_2 = 0.999, early_stopping = False, epsilon = 1e-08,  hidden_layer_sizes = (10, 10, 10, 10), learning_rate_init = 0.001,  max_fun = 15000, max_iter = 300, momentum = 0.9,  n_iter_no_change = 10, solver = adam, tol = 0.0001 |
| KNN | algorithm = auto, leaf_size = 30, metric = minkowski,  metric_params = None, n_neighbors = 5, weights = uniform |
| ANN | layer = 6, activation = ReLU and sigmoid, optimizer = adam,  loss = binary_crossentropy, metrics = accuracy, epochs = 100,  batch_size = 64, verbose = 2, Earlystopping(monitor = val_loss,  patience = 100, restore_best_weights = True) |
| LSTM | Bidirectional = True, hidden units = 50, dense layer = 1,  activation = sigmoid, loss = binary_crossentropy, epochs = 100,  optimizer = adam, metrics = accuracy, batch_size = 64,  verbose = 2, Earlystopping(monitor = val_loss, patience = 100,  restore_best_weights = True) |
| CNN | kernel = 2, activation = ReLU and sigmoid, epoch = 100,  optimizer = adam, metrics = accuracy, batch_size = 64,  verbose = 2, Earlystopping(monitor = val_loss, patience = 100,  restore_best_weights = True) |
| XGBoost | objective = binary:logistic, base_score = 5E-1, booster = gbtree |
| LightGBM | boosting_type = gbdt, colsample_bytree = 1.0, max_depth = -1,  min_child_samples = 20, min_child_weight = 0.001,  n_estimators=1000, num_leaves=64, learning_rate = 0.1,  subsample=1.0, subsample_for_bin=200000, subsample_freq=0 |
| Random Forest | bootstrap = True, criterion = gini, max_depth = None,  max_features = sqrt, max_leaf_nodes = None, verbose=0,  max_samples = None, min_samples_leaf = 1,  min_samples_split = 2, n_estimators = 100 |

LR, Logistic Regression; SGD, Stochastic Gradient Descent; SVM, Support Vector Machine; MLP, Multilayer Perceptron; KNN, K-Nearest Neighbor; ANN, Artificial Neural Network; LSTM, Long Short-Term Memory; CNN, Convolutional Neural Network; XGBoost, eXtreme Gradient Boosting; LightGBM, Light Gradient Boosting Machine.
